# Supplementary material for: Combinatorial Computational Approaches to Identify Tetracycline Derivatives as Flavivirus Inhibitors
Source: PLOS journal article supplement (doi:10.1371/journal.pone.0000428), 2007-05-08
Supplement: S4 (10.1371/journal.pone.0000428.s004) [file journal.pone.0000428.s004]

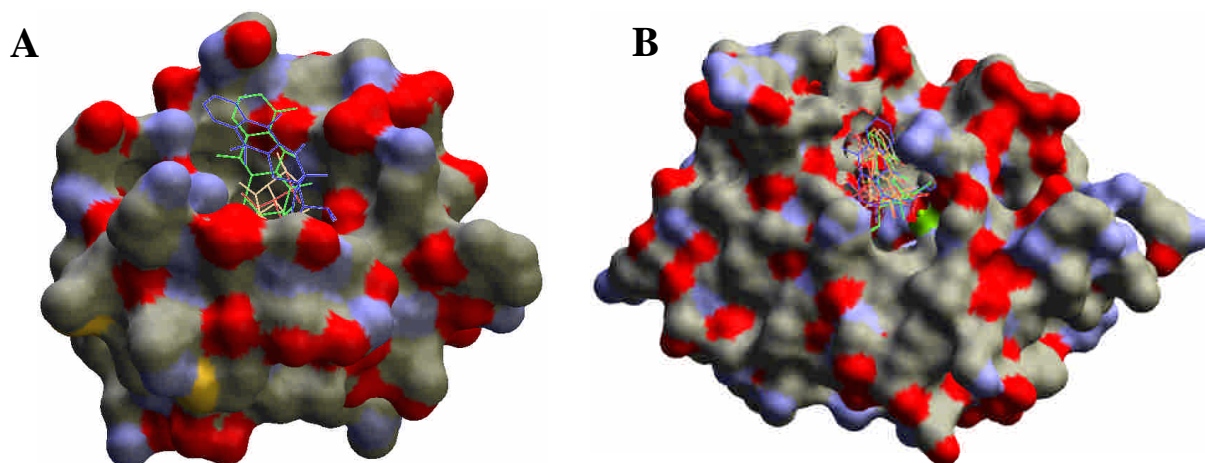

**Figure S2.** The surfaces and the docked conformations of the four tetracycline-derivatives on TetR protein and DV E protein according to GEMDOCK. (A) TetR protein (PDB code 2TRT); (B) DV E protein (PDB code 1OKE). The surfaces and sizes of the binding sites of these two proteins are similar. In addition, docked conformations of the four tetracycline-derivatives in these two proteins are also similar.
